# Supplementary material for: IL-33 modulates inflammatory brain injury but exacerbates systemic immunosuppression following ischemic stroke
Source: JCI journal article supplement (doi:10.1172/jci.insight.121560), 2018-09-19
Supplement: sd1 [file 1]

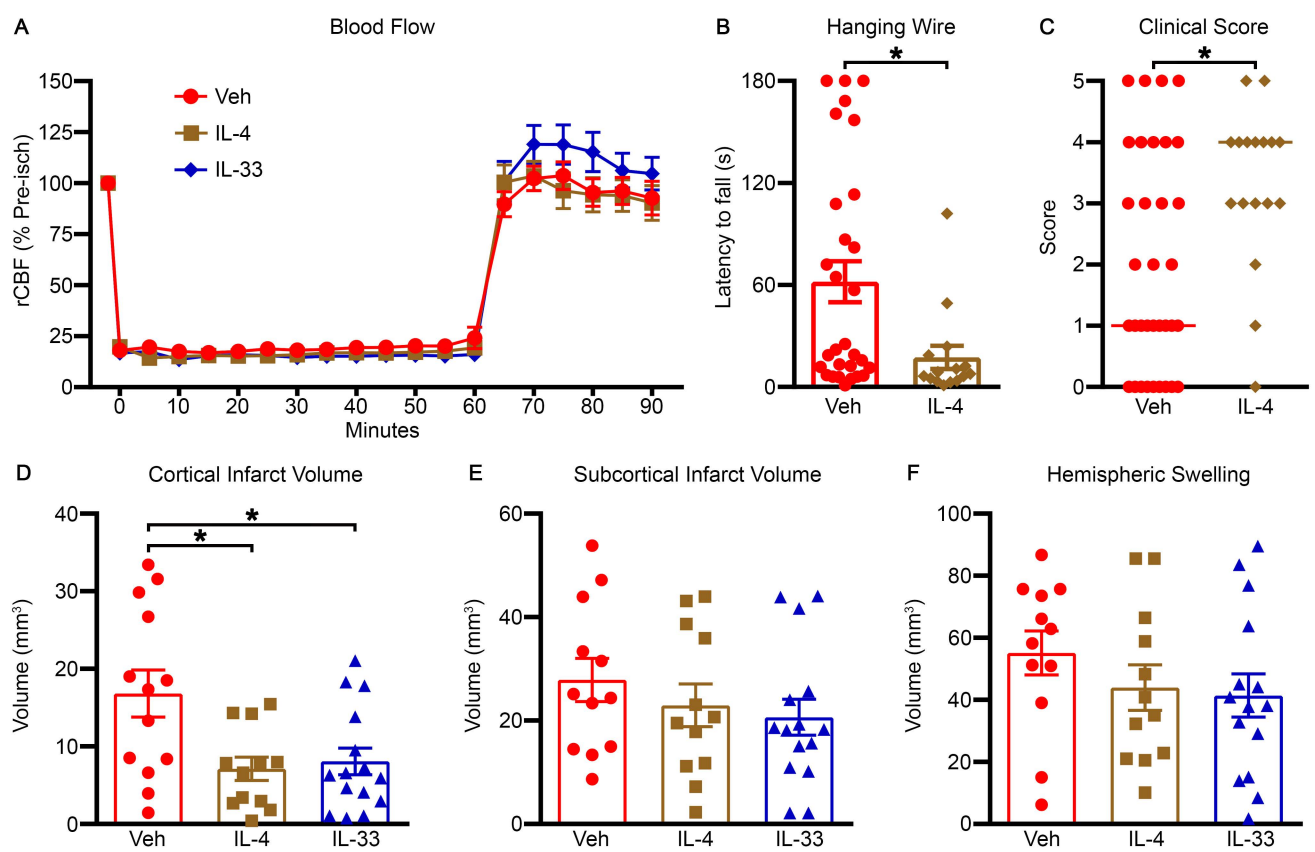

**Supplemental Figure 1. Regional cerebral blood flow, infarct volumes and functional outcome.** (A) Regional cerebral blood flow during 1 h middle cerebral artery occlusion and 30 min reperfusion, (B) hanging wire latency to fall (C) clinical score, (D) cortical and (E) subcortical infarct volumes, and (F) hemispheric swelling at 24 h after stroke. Data are presented as mean $\pm$ SEM for (A, B, and D-F) and as median scores for (C). \*P<0.05 compared with vehicle; Student's unpaired t-test for (B), Mann-Whitney test for (C), and one-way ANOVA with Bonferroni post hoc for (D-F). Blood flow: n=18-30; hanging wire: n=15-29; clinical score: n=17-34; infarct volumes: n=12-15. Veh, Vehicle.

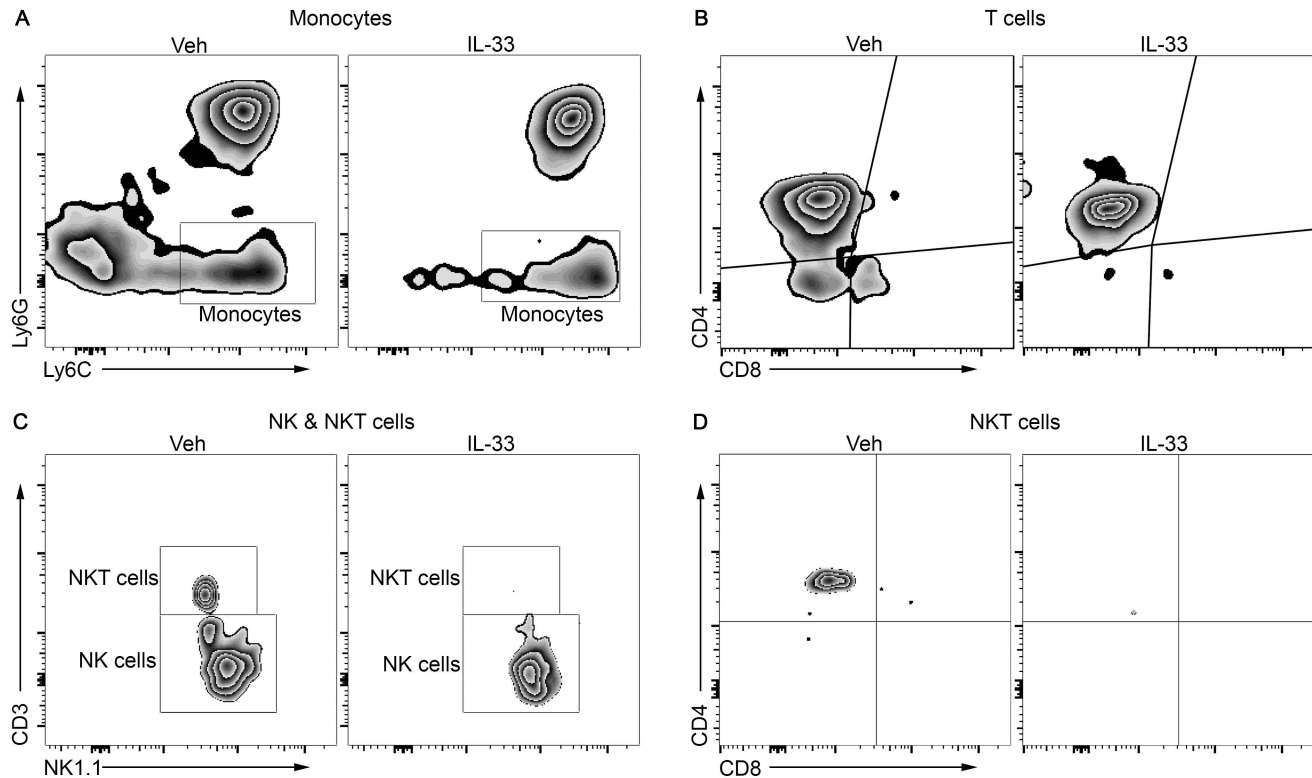

**Supplemental Figure 2. Representative flow cytometry panels of leukocytes in the brain after stroke.** Gating strategies for (A) monocytes, (B) T cells, (C) NK and NKT cells and (D) CD4<sup>+</sup>CD8<sup>+</sup> NKT cells at 24 h after stroke in mice treated with vehicle (Veh) or IL-33.

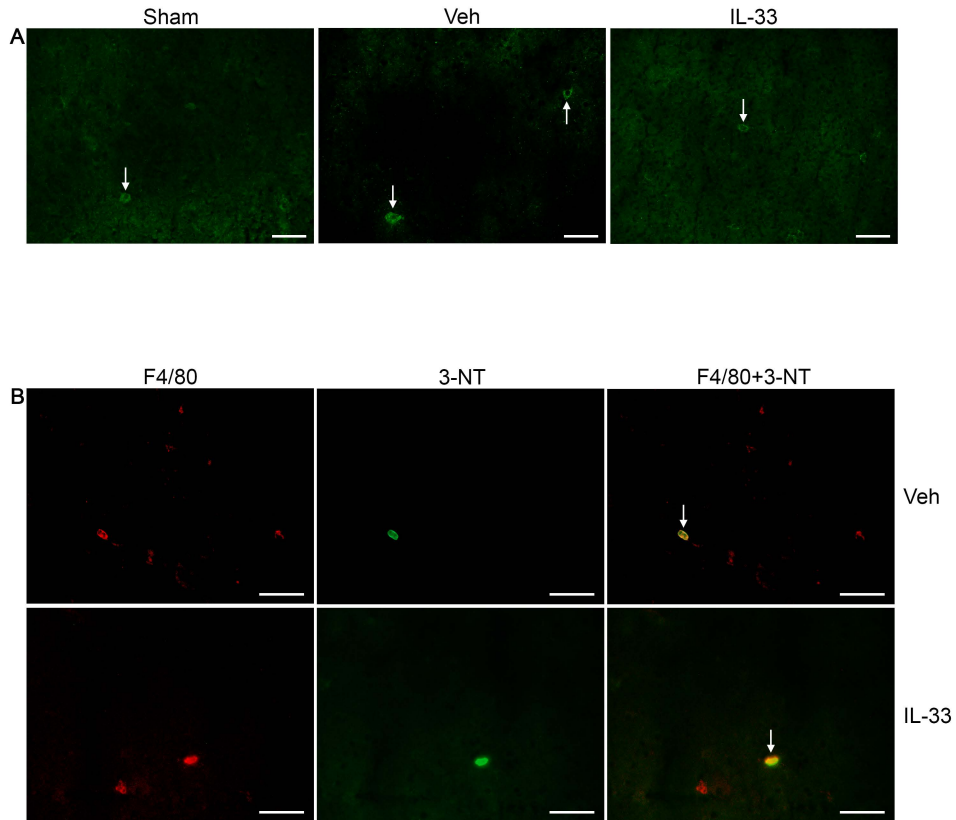

**Supplemental Figure 3. Representative images of microglia and macrophages in the brain after stroke using immunohistochemistry.** (A) Immunohistochemical staining of CD68+ cells in the ipsilateral hemisphere of sham-operated mice, or stroke-operated mice treated with vehicle or IL-33. (B) Double immunohistochemical staining of F4/80 and 3-nitrotyrosine (3-NT) in the ischemic hemisphere of mice treated with vehicle or IL-33 at 24 h after stroke. Veh, Vehicle. Scale bar = 50  $\mu$ m.

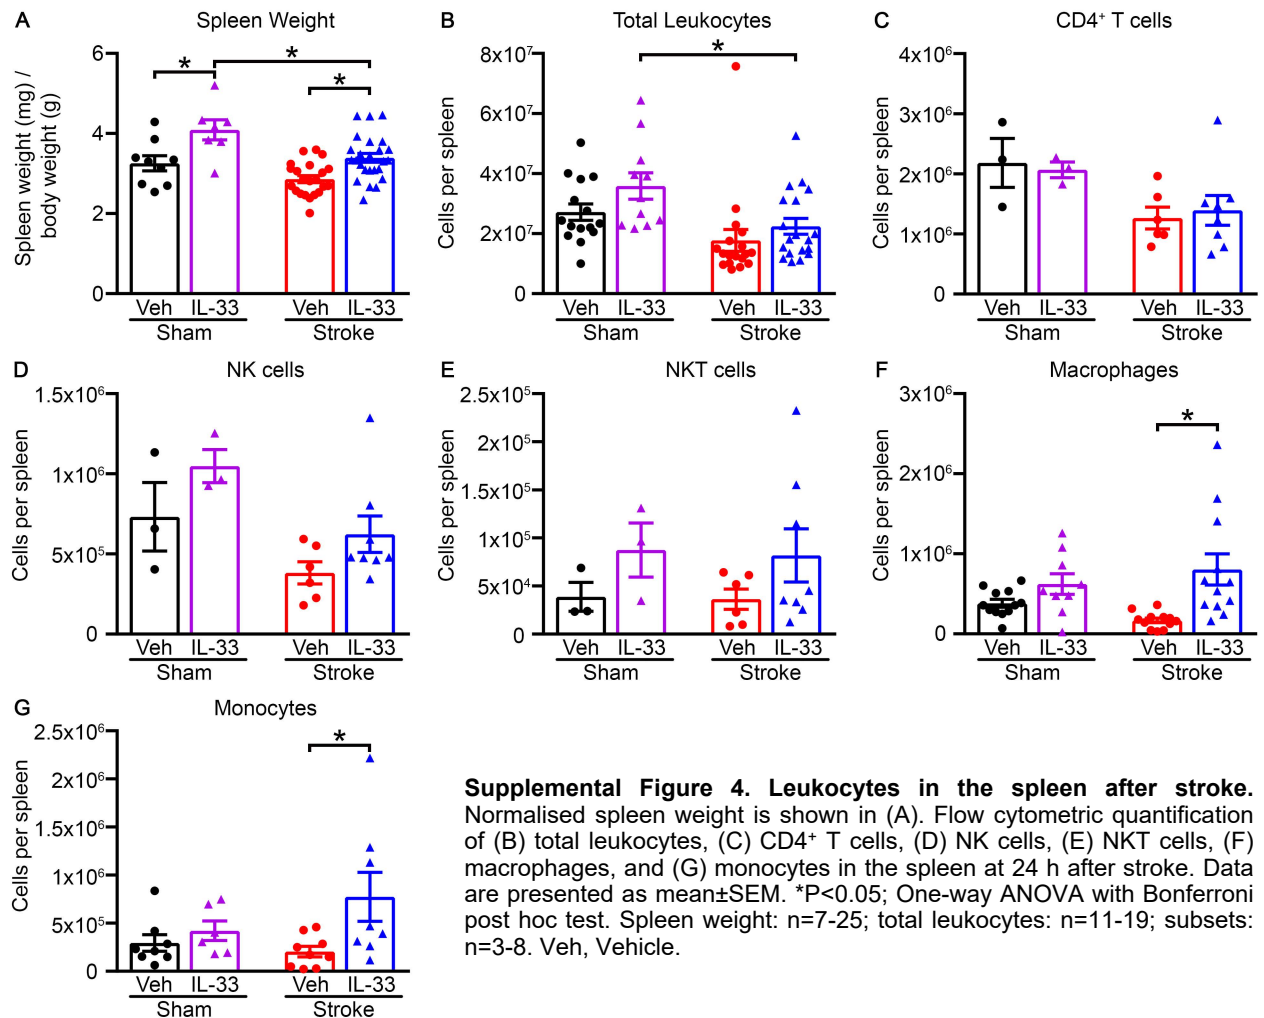

**Supplemental Figure 4. Leukocytes in the spleen after stroke.** Normalised spleen weight is shown in (A). Flow cytometric quantification of (B) total leukocytes, (C) CD4<sup>+</sup> T cells, (D) NK cells, (E) NKT cells, (F) macrophages, and (G) monocytes in the spleen at 24 h after stroke. Data are presented as mean±SEM. \*P<0.05; One-way ANOVA with Bonferroni post hoc test. Spleen weight: n=7-25; total leukocytes: n=11-19; subsets: n=3-8. Veh, Vehicle.

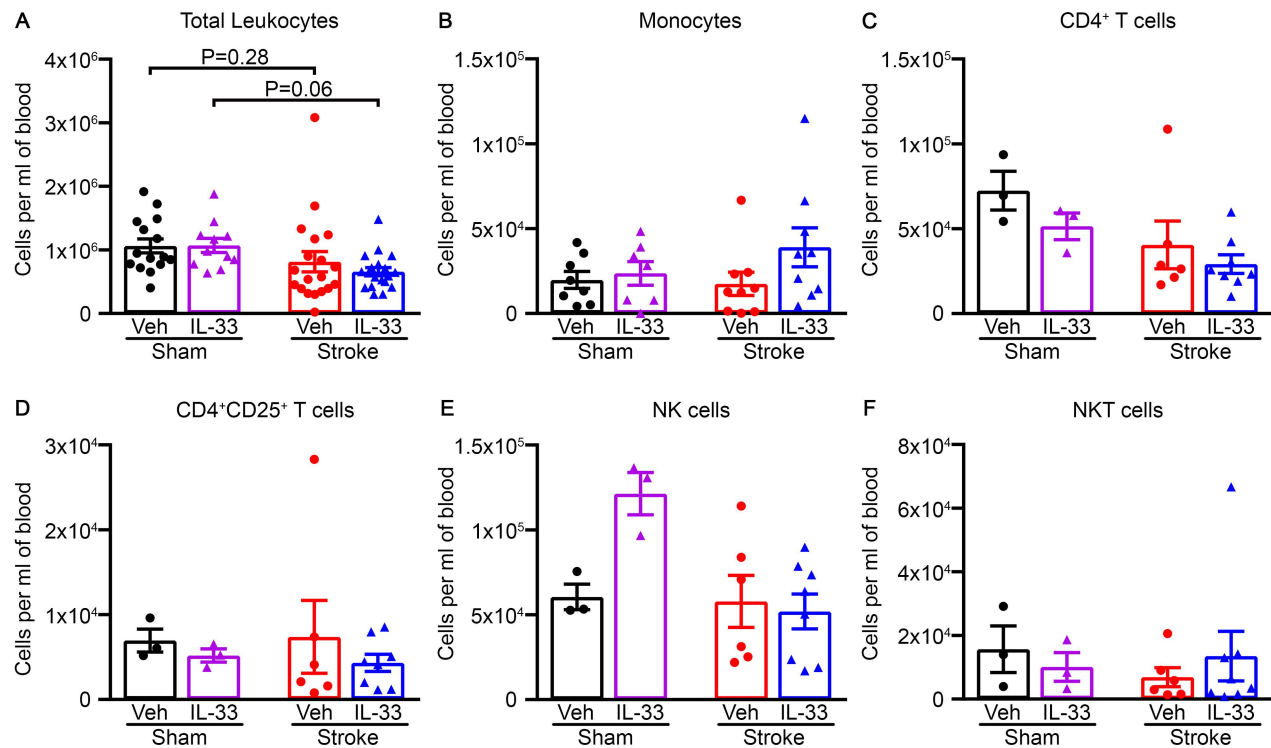

**Supplemental Figure 5. Leukocytes in the circulation after stroke.** Flow cytometric quantification of (A) total leukocytes, (B) monocytes, (C) CD4<sup>+</sup> T cells, (D) CD4<sup>+</sup>CD25<sup>+</sup> T cells (E) NK cells and (F) NKT cells per ml of blood at 24 h after stroke. Data are presented as mean±SEM. One-way ANOVA with Bonferroni post hoc test. Total leukocytes: n=11-19; subsets: n=3-8. Veh, Vehicle.

T-bet<sup>-/-</sup> mice - Stroke

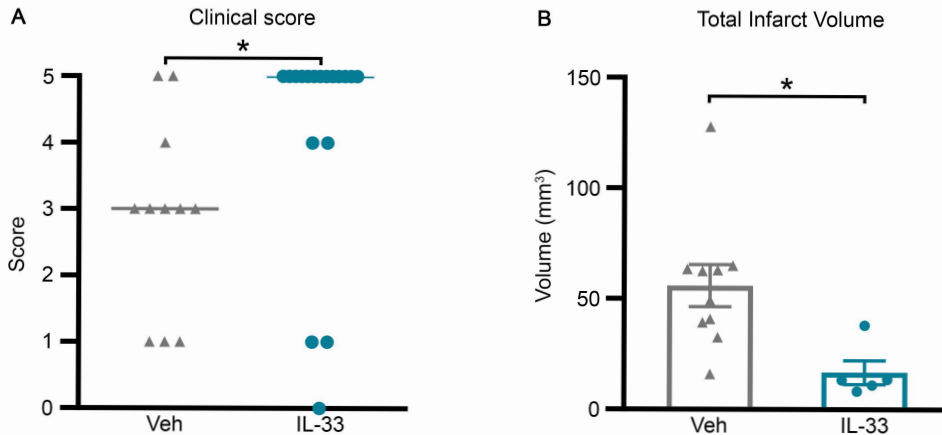

**Supplemental Figure 6. Functional outcome and infarct volume in T-bet<sup>-/-</sup> mice.** (A) Clinical score and (B) total infarct volume at 24 h after stroke. Data are presented with median scores in (A) and as mean±SEM in (B). \*P<0.05; Mann-Whitney test for (A) and Student's unpaired t-test for (B). Clinical score: n=11-18; infarct volume: n=5-10. Veh, Vehicle.

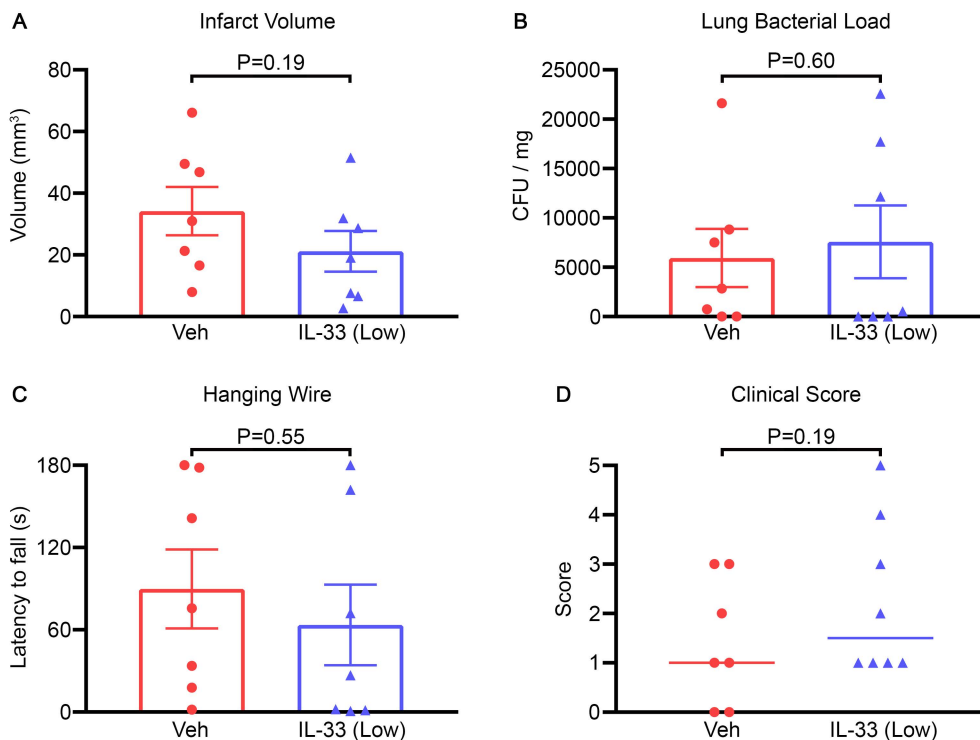

**Supplemental Figure 7. Infarct volume, post-stroke infection and functional outcome in mice with 45 min of MCA occlusion.** (A) Total infarct volume, (B) bacterial load in lung, (C) hanging wire latency to fall, and (D) clinical score at 24 h after stroke. Data are presented as mean $\pm$ SEM for (A-C) and as median scores in (D). Student's unpaired t-test for (A-C) and Mann-Whitney test for (D); n=7-8. Veh, Vehicle; IL-33 (Low), Low dose IL-33.
